# Supplementary material for: Targeted high-throughput sequencing of candidate genes for chronic obstructive pulmonary disease
Source: Springer Nature journal article supplement (doi:10.1186/s12890-016-0309-y), 2016-11-11

Plotted SNPs

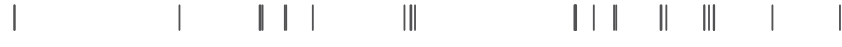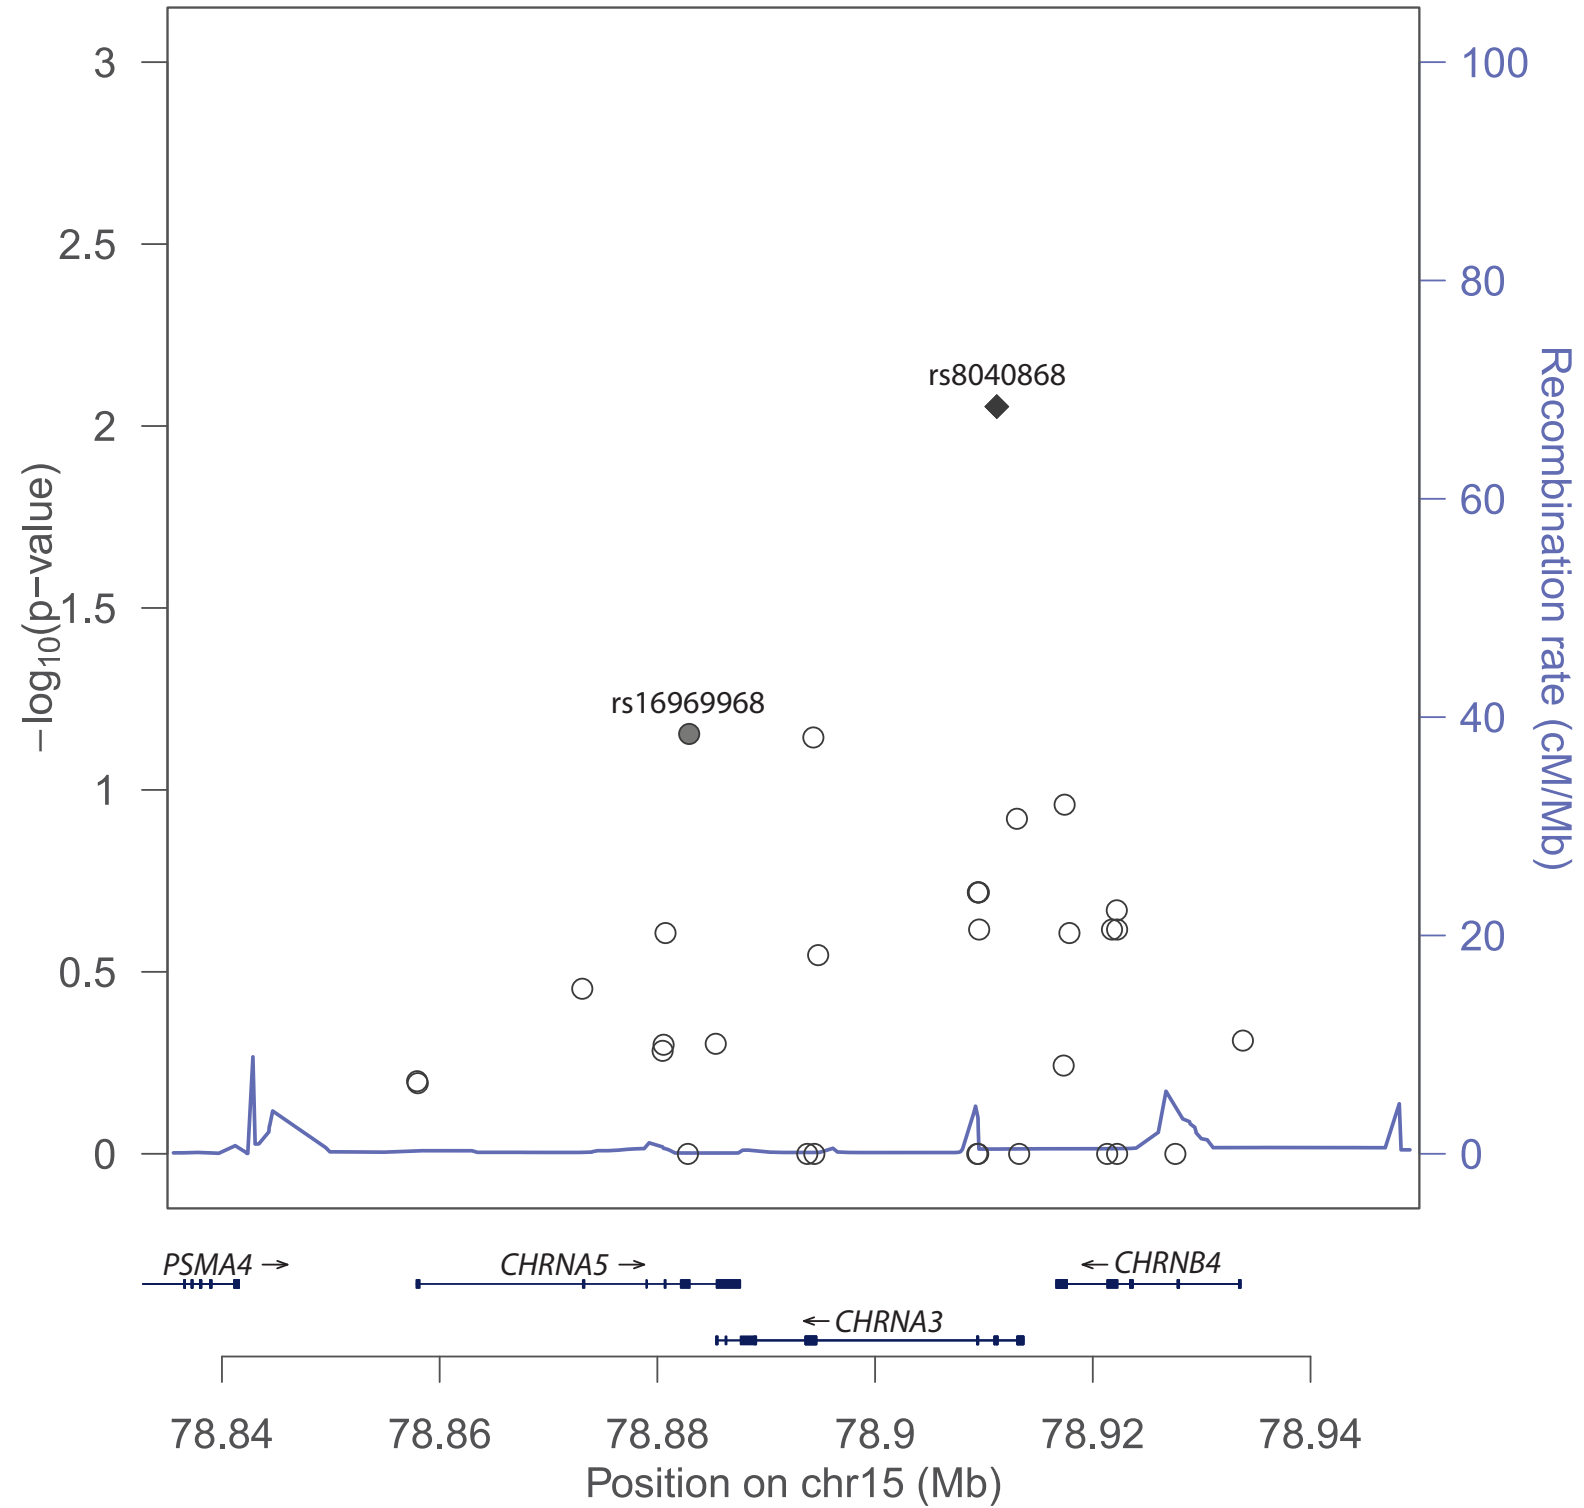

Supplement: MOESM6 [file 11039842]
